# Supplementary material for: Meta-analysis of the effect of hyperbaric oxygen therapy on exercise-induced fatigue in athletes after exercise
Source: Research Square preprint supplement (doi:10.21203/rs.3.rs-8185331/v1), 2025-12-11
Supplement: Supplementary file 1 [file 8b98e824e72bde18c1d35128.docx]

**Table 2: Basic Characteristics of Included Literature**

| **First Author** | **year** | **sample（E/T，n）** | **gender（M/W，n）** | **Interventions** | | **Intervention**  **cycle** | **Time** | **Outcome measures** | **Adverse**  **event** |
| --- | --- | --- | --- | --- | --- | --- | --- | --- | --- |
| **Experimental group** | **Control group** |
| Zhu [12] | 2022 | 8/8 | 8/8 | 1.3ATA | Natural recovery | 4 weeks/16 time | 60min | MDA,PC,SOD,CAT,GSH-PX,T-AOC, BU, CK,T, and C | Not mentioned |
| Si-Hwa [13] | 2018 | 10/10 | 10/0 | 1.3ATA | Natural recovery | 3 weeks/3 times | 30min | HR、BLA、ALT | Not mentioned |
| Braulio [14] | 2016 | 11/11 | 11/0 | 2.39ATA | Natural recovery | 6 weeks/1 time | 100min | CK、AST、ALT、LDH、RPE、RPR | Not mentioned |
| Widiyanto [15] | 2018 | 20/10 | 30/0 | 1.8ATA | Natural recovery | 1 time | 15min | RPE、BLA | Not mentioned |
| Thibaud [22] | 2021 | 12/12 | 12/0 | 1.3ATA | Natural recovery | 1 time | 75min | HRV、BLA、PE | Not mentioned |
| Chaoyi [23] | 2024 | 12/12 | 12/0 | 1.29 ATA and 40%-50% oxygen | Natural recovery | 6 days / 2 times | 60min | RPE、HR、SpO2、SLJ、CK、BUN、SOD、MDA | Not mentioned |
| Jinhee [24] | 2020 | 6/6 | 12/0 | 2.5 ATA，100% oxygen | Natural recovery | 1 time | 60 min | BE、AH、CK、LDH、BAP | Not mentioned |
| Kormanovski [25] | 2010 | 22/12 | 34/0 | 2.5 ATA | Natural recovery | 8 days / 2 times | 75min | Glu、TG、CK、HCT、PLT、AOC、GPx、SOD | Not mentioned |
| Ma [26] | 2023 | 8/7 | 7/8 | 1.3ATA、28%-30% oxygen | Natural recovery | 6 weeks/18 times | 60min | HRV、WBC、T、T/C、BU、CK、Cr | Not mentioned |
| Li [27] | 2012 | 10/10 | 20/0 | 1.2ATA | Natural recovery | 4 weeks/4 times | 120min | AST、LDH、HBDH、WBC、CK、Hb、PLT | Not mentioned |
| Tao [28] | 2003 | 6/6 | 12/0 | 2.5 ATA，100% oxygen | Natural recovery | 1 time | 85min | HR、RPE、BUN、BL | Not mentioned |
| Bi [29] | 2020 | 15/15 | 0/30 | 2.5 ATA | Natural recovery | 1 time | 85min | HR、BLA、RPE、CK、BUN、T、C | Not mentioned |
| Liu [30] | 2021 | 8/8 | 16/0 | 2.2ATA | Natural recovery | 1 time | 85min | HR、BLA、RPE、CK、BUN、T、C | Not mentioned |
| Zhang [31] | 2023 | 10/10 | 10/10 | 1.3 ATA | Natural recovery | 4 weeks/16 times | 60min | HRV、WBC、T、T/C、BU、CK、Cr | Not mentioned |
| Bi [32] | 2015 | 8/8 | 8/0 | 2.5 ATA-3.0 ATA | Natural recovery | 1 time | 60min | HR、BLA、BUN、T/C、CK | Not mentioned |

**Table Notes: ATA**: Absolute atmospheric pressure**. ALT**: Alanine transaminase**. AST**: Aspartate transaminase**. BAP**: Bioactive peptides**. BLA**: Blood lactate**. BU**: Blood urea**. C**: Cortisol**. CAT**: Catalase**. CK**: Creatine kinase**. Glu**: Glucose**. HR**: Heart rate**. HRV**: Heart rate variability**. LDH**: Lactate dehydrogenase**. MDA**: Malondialdehyde**. PC**: Protein carbonyl**. PE**: Pulmonary embolism**. PLT**: Platelets**. RPE**: Rating of perceived exertion**. SOD**: Superoxide dismutase**. SpO2**: Oxygen saturation**. T**: Testosterone**. WBC**: White blood cells.
