# Supplementary material for: Meta-analysis of the effect of hyperbaric oxygen therapy on exercise-induced fatigue in athletes after exercise
Source: Research Square preprint supplement (doi:10.21203/rs.3.rs-8185331/v1), 2025-12-11
Supplement: Supplementary file 2 [file cff4493df7e221f0d7f503d6.docx]

| PubMed Dataases |
| --- |
| #1 High pressure oxygen [Title/Abstract] #2 HBO [Title/Abstract] #3 Hyperbaric oxygen ation [Title/Abstract] #4 Hyperbaric oxygen chamber [Title/Abstract] #5 Hyperbaric oxygen intervention [Title/Abstract] #6 #1 OR #2 OR #3 OR #4 OR #5 #7 Athlete [Title/Abstract] #8 Sports crowd [Title/Abstract] #9 Sports fatigue [Title/Abstract] #10 Fatigued [Title/Abstract] #11 Eliminate recovery [Title/Abstract] #12 Restore the effect [Title/Abstract] #13 #6 OR #7 OR #8 OR #9 OR #10 OR #11 OR #12 #14 #6 AND #13 |

**Table 1: Schematic Diagram of English Data Search Strategies**
