# Supplementary material for: Meta-analysis of the effect of hyperbaric oxygen therapy on exercise-induced fatigue in athletes after exercise
Source: Research Square preprint supplement (doi:10.21203/rs.3.rs-8185331/v1), 2025-12-11
Supplement: Supplementary file 3 [file f0cddf2982696177b2acc454.docx]

| First Author | year | Subjects were included in the conditions | Randomized | Assign hidden | The baseline is similar | Subjects were blinded | Participants were blinded | Outcome measures were blinded | More than 85% of people were given at least one primary outcome measure | Intention-to-treat analysis | Inter-group statistical report | Outcome point test values and variant measurements | PEDroscore | Quality evaluation |
| --- | --- | --- | --- | --- | --- | --- | --- | --- | --- | --- | --- | --- | --- | --- |
| Zhu[18] | 2022 | + | + | - | + | - | - | - | + | + | + | + | 6 | High quality |
| Si-Hwa[19] | 2018 | + | + | - | + | - | + | - | + | + | + | + | 7 | High quality |
| Braulio[20] | 2016 | + | + | - | + | - | - | - | + | + | + | + | 6 | High quality |
| Widiyanto[21] | 2018 | + | + | - | + | - | + | - | + | + | + | + | 7 | High quality |
| Thibaud[22] | 2021 | + | + | - | + | - | - | - | + | + | + | + | 6 | High quality |
| Chaoyi[23] | 2024 | + | + | - | + | - | - | - | + | + | + | + | 6 | High quality |
| Jinhee[24] | 2020 | + | + | - | + | - | + | - | + | + | + | + | 7 | High quality |
| Kormanovski[25] | 2010 | + | + | - | + | - | + | - | + | + | + | + | 7 | High quality |
| Ma 26] | 2023 | + | + | - | + | - | - | - | + | + | + | + | 6 | High quality |
| Li [27] | 2012 | + | + | - | + | - | + | - | + | + | + | + | 7 | High quality |
| Tao [28] | 2003 | + | + | - | + | - | - | - | + | + | + | + | 6 | High quality |
| Bi [29] | 2020 | + | + | - | + | - | - | - | + | + | + | + | 6 | High quality |
| Liu [30] | 2021 | + | + | - | + | - | - | - | + | + | + | + | 6 | High quality |
| Zhang [31] | 2023 | + | + | - | + | - | - | - | + | + | + | + | 6 | High quality |
| Bi[27] | 2015 | + | + | - | + | - | + | - | + | + | + | + | 7 | High quality |

**Table 3: PEDro Scores of Included Literature**

Table note: + indicates that the corresponding indicator is met; - The representative does not meet the corresponding indicators; Baseline similarity refers to the similarity of groups at baseline for important prognostic measures; Blinding refers to blinding; More than 85% of people were measured for at least one primary outcome, meaning that if not reported, they were taken as negative outcomes; Intention-to-treat analysis means that all participants complete trials and tests as required, with at least one primary outcome if not, and negative outcomes if not reported.
